# Supplementary material
Source: publisher site journal article supplement (https://www.dovepress.com/article/116997)
Supplement: Supplementary file 1 [file get_supplementary_file.php%3Ff%3D116997.pdf]

## McGill 疼痛调查量表-2 (简表)

该调查表提供了一系列描述性词汇，用以表述疼痛以及相关症状的不同特性。请在每一种疼痛以及相关症状中选择最能够描述你在过去的一周里感受到的疼痛强度，请参照下图并用符号√标示出来。如果相应的词汇不符合你的疼痛症状，则选择 0，十分符合则选择 10。

|    |      |    |   |   |   |   |   |   |   |   |   |   |    |     |
|----|------|----|---|---|---|---|---|---|---|---|---|---|----|-----|
| 1  | 跳动的痛 | 没有 | 0 | 1 | 2 | 3 | 4 | 5 | 6 | 7 | 8 | 9 | 10 | 最糟糕 |
| 2  | 放射样痛 | 没有 | 0 | 1 | 2 | 3 | 4 | 5 | 6 | 7 | 8 | 9 | 10 | 最糟糕 |
| 3  | 刺痛   | 没有 | 0 | 1 | 2 | 3 | 4 | 5 | 6 | 7 | 8 | 9 | 10 | 最糟糕 |
| 4  | 锐痛   | 没有 | 0 | 1 | 2 | 3 | 4 | 5 | 6 | 7 | 8 | 9 | 10 | 最糟糕 |
| 5  | 绞痛   | 没有 | 0 | 1 | 2 | 3 | 4 | 5 | 6 | 7 | 8 | 9 | 10 | 最糟糕 |
| 6  | 牙咬样痛 | 没有 | 0 | 1 | 2 | 3 | 4 | 5 | 6 | 7 | 8 | 9 | 10 | 最糟糕 |
| 7  | 烧灼痛  | 没有 | 0 | 1 | 2 | 3 | 4 | 5 | 6 | 7 | 8 | 9 | 10 | 最糟糕 |
| 8  | 酸痛   | 没有 | 0 | 1 | 2 | 3 | 4 | 5 | 6 | 7 | 8 | 9 | 10 | 最糟糕 |
| 9  | 沉重样痛 | 没有 | 0 | 1 | 2 | 3 | 4 | 5 | 6 | 7 | 8 | 9 | 10 | 最糟糕 |
| 10 | 触痛   | 没有 | 0 | 1 | 2 | 3 | 4 | 5 | 6 | 7 | 8 | 9 | 10 | 最糟糕 |
| 11 | 撕裂样痛 | 没有 | 0 | 1 | 2 | 3 | 4 | 5 | 6 | 7 | 8 | 9 | 10 | 最糟糕 |
| 12 | 疲劳乏力 | 没有 | 0 | 1 | 2 | 3 | 4 | 5 | 6 | 7 | 8 | 9 | 10 | 最糟糕 |
| 13 | 眩晕恶心 | 没有 | 0 | 1 | 2 | 3 | 4 | 5 | 6 | 7 | 8 | 9 | 10 | 最糟糕 |
| 14 | 恐惧   | 没有 | 0 | 1 | 2 | 3 | 4 | 5 | 6 | 7 | 8 | 9 | 10 | 最糟糕 |
| 15 | 受惩罚感 | 没有 | 0 | 1 | 2 | 3 | 4 | 5 | 6 | 7 | 8 | 9 | 10 | 最糟糕 |
| 16 | 电击样痛 | 没有 | 0 | 1 | 2 | 3 | 4 | 5 | 6 | 7 | 8 | 9 | 10 | 最糟糕 |
| 17 | 冻僵样痛 | 没有 | 0 | 1 | 2 | 3 | 4 | 5 | 6 | 7 | 8 | 9 | 10 | 最糟糕 |
| 18 | 穿心样痛 | 没有 | 0 | 1 | 2 | 3 | 4 | 5 | 6 | 7 | 8 | 9 | 10 | 最糟糕 |
| 19 | 轻触痛  | 没有 | 0 | 1 | 2 | 3 | 4 | 5 | 6 | 7 | 8 | 9 | 10 | 最糟糕 |
| 20 | 痒    | 没有 | 0 | 1 | 2 | 3 | 4 | 5 | 6 | 7 | 8 | 9 | 10 | 最糟糕 |
| 21 | 麻刺感  | 没有 | 0 | 1 | 2 | 3 | 4 | 5 | 6 | 7 | 8 | 9 | 10 | 最糟糕 |

---

22 麻木感

没有

0 1 2 3 4 5 6 7 8 9 10

最糟糕

---
